# Supplementary material
Source: ML conference proceedings conference paper supplement (https://openreview.net/forum?id=IlFk5U9cEg)

Aliquam eius modi ut.

How awesome is this?

Not Awesome ☐ ☐ ☐ ☐ ☐ Completely Awesome

Aliquam eius modi ut.

How does this text make you feel?

- A. Isn't this awesome?!
- B. I like you
- C. great!
- D. Awesome
- E. Amazing

Which is the most positive sentence?

☐ A ☐ B ☐ C ☐ D ☐ E

Which is the most negative sentence?

☐ A ☐ B ☐ C ☐ D ☐ E

I want to be a blue collar, Buffalo-bred man but...honestly...I can't stop crying.I'm not crying you're crying!

Which type of Issue-General immigration framing is used in the given tweet?

- ☐ Economic
- ☐ Capacity and Resources
- ☐ Morality and Ethics
- ☐ Fairness and Equality
- ☐ Legality, Constitutionality, Jurisdiction
- ☐ Crime and Punishment
- ☐ Security and Defense
- ☐ Health and Safety
- ☐ Quality of Life
- ☐ Cultural Identity
- ☐ Public Sentiment
- ☐ Political Factors and Implications
- ☐ Policy Prescription and Evaluation
- ☐ External Regulation and Reputation
- ☐ None

Which types of Issue-Specific immigration framing are used in the given tweet?

- ☐ Victim: Global Economy
- ☐ Victim: Humanitarian
- ☐ Victim: War
- ☐ Victim: Discrimination
- ☐ Hero: Cultural Diversity
- ☐ Hero: Integration
- ☐ Hero: Worker
- ☐ Threat: Jobs
- ☐ Threat: Public Order
- ☐ Threat: Fiscal
- ☐ Threat: National Cohesion
- ☐ None

Which type of Narrative are used in the given tweet?

- ☐ Episodic
- ☐ Thematic
- ☐ None

Isn't this awesome?!

Select all appropriate GIF replies.

☐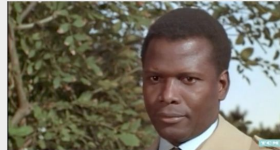☐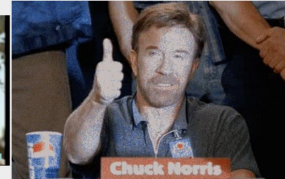☐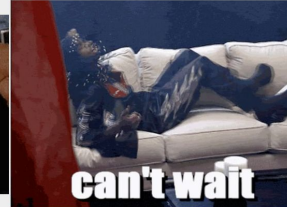

Supplement: supplementary_material [file attachment]
