# Supplementary material
Source: ML conference proceedings conference paper supplement (https://openreview.net/forum?id=IlFk5U9cEg)
Supplement: supplementary_material [file attachment]

FREE for everyone

Easy to deploy

Caring for the annotators

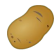

POTATO: **Portable** text annotation tool

Improving productivity

Flexible for diverse needs

Open-sourcing
